# Supplementary material
Source: MDPI journal article supplement (https://www.mdpi.com/2076-3417/10/3/1133)
Supplement: s1 [file s1]

Archive with 2 entries (2 files):
- Supplementary Material_final.docx
- Supplementary Material_final.pdf
